# Supplementary material for: Intramolecular dimer formation reveals anomalous solvation within fluorous solvent perfluorodecalin
Source: Royal Society of Chemistry journal article supplement (doi:10.1039/d3cp02284f), 2023-01-01
Supplement: d3cp02284f1.pdf [file d3cp02284f1.pdf]

**ESI**

**Intramolecular dimer formation reveals anomalous  
solvation within fluoruous solvent perfluorodecalin**

Deepika and Siddharth Pandey\*

Department of Chemistry, Indian Institute of Technology Delhi, Hauz Khas, New Delhi –  
110016, India.

\*To whom correspondence should be addressed.

E-mail: sipandey@chemistry.iitd.ac.in, Phone: +91-11-26596503, Fax: +91-11-26581102

## Table of Contents

|          | <b>Page No.</b> |
|----------|-----------------|
| Table S1 | S3              |
| Table S2 | S5              |
| Table S3 | S6              |
| Table S4 | S8              |
| Fig. S1  | S11             |
| Fig. S2  | S12             |
| Fig. S3  | S13             |
| Fig. S4  | S14             |
| Fig. S5  | S15             |
| Fig. S6  | S16             |
| Fig. S7  | S17             |
| Fig. S8  | S18             |
| Fig. S9  | S19             |
| Fig. S10 | S20             |
| Fig. S11 | S21             |
| Fig. S12 | S22             |
| Fig. S13 | S23             |
| Fig. S14 | S24             |

**Table S1.** Recovered Excited-State Intensity Decay Parameters for BPP (20  $\mu\text{M}$ ; excitation with 340 nm NanoLED) Dissolved in PFD and *n*-hexane added PFD at Different Mole Fraction Ratios and at Different Temperatures Obtained *via* Global Fitting Strategy. Errors Associated with Decay Times are  $\leq \pm 5\%$ .

| $T/\text{K}$                                  | $\lambda_{\text{em}}/\text{nm}$ | $\tau_1/\text{ns} (\alpha_1)$ | $\tau_2/\text{ns} (\alpha_2)$ | $\chi^2$ |
|-----------------------------------------------|---------------------------------|-------------------------------|-------------------------------|----------|
| $x_{\text{PFD}} = 0.9 / x_{\text{Hex}} = 0.1$ |                                 |                               |                               |          |
| 293.15                                        | 376                             | 5.23 (0.89)                   | 14.9 (0.11)                   | 1.05     |
|                                               | 480                             | 5.23 (-0.48)                  | 14.9 (0.52)                   | 1.33     |
| 303.15                                        | 376                             | 4.17 (0.89)                   | 13.0 (0.11)                   | 1.16     |
|                                               | 480                             | 4.17 (-0.49)                  | 13.0 (0.51)                   | 1.41     |
| 313.15                                        | 376                             | 3.40 (0.89)                   | 11.4 (0.11)                   | 1.20     |
|                                               | 480                             | 3.40 (-0.48)                  | 11.4 (0.52)                   | 1.34     |
| 323.15                                        | 376                             | 2.78 (0.90)                   | 9.82 (0.10)                   | 1.47     |
|                                               | 480                             | 2.78 (-0.49)                  | 9.82 (0.51)                   | 1.27     |
| 333.15                                        | 376                             | 2.23 (0.90)                   | 8.51 (0.10)                   | 1.40     |
|                                               | 480                             | 2.23 (-0.49)                  | 8.51 (0.51)                   | 1.45     |
| $x_{\text{PFD}} = 0.8 / x_{\text{Hex}} = 0.2$ |                                 |                               |                               |          |
| 293.15                                        | 376                             | 4.91 (0.94)                   | 13.8 (0.06)                   | 1.20     |
|                                               | 480                             | 4.91 (-0.49)                  | 13.8 (0.51)                   | 1.27     |
| 303.15                                        | 376                             | 3.88 (0.94)                   | 12.2 (0.06)                   | 1.02     |
|                                               | 480                             | 3.88 (-0.49)                  | 12.2 (0.51)                   | 1.23     |
| 313.15                                        | 376                             | 3.01 (0.93)                   | 10.9 (0.07)                   | 0.98     |
|                                               | 480                             | 3.01 (-0.49)                  | 10.9 (0.51)                   | 1.27     |
| 323.15                                        | 376                             | 2.47 (0.93)                   | 9.51 (0.07)                   | 0.84     |
|                                               | 480                             | 2.47 (-0.50)                  | 9.51 (0.50)                   | 1.24     |
| 333.15                                        | 376                             | 1.94 (0.90)                   | 7.72 (0.10)                   | 1.07     |
|                                               | 480                             | 1.94 (-0.48)                  | 7.72 (0.52)                   | 1.17     |
| $x_{\text{PFD}} = 0.5 / x_{\text{Hex}} = 0.5$ |                                 |                               |                               |          |
| 293.15                                        | 376                             | 3.66 (0.97)                   | 9.45 (0.03)                   | 0.95     |
|                                               | 480                             | 3.66 (-0.49)                  | 9.45 (0.51)                   | 1.26     |

|                                                                 |     |              |             |      |
|-----------------------------------------------------------------|-----|--------------|-------------|------|
| 303.15                                                          | 376 | 3.06 (0.97)  | 8.71 (0.03) | 0.95 |
|                                                                 | 480 | 3.06 (-0.50) | 8.70 (0.50) | 1.35 |
| 313.15                                                          | 376 | 2.51 (0.95)  | 8.14 (0.05) | 0.79 |
|                                                                 | 480 | 2.51 (-0.50) | 8.14 (0.50) | 1.16 |
| 323.15                                                          | 376 | 2.15 (0.95)  | 7.37 (0.05) | 0.83 |
|                                                                 | 480 | 2.15 (-0.50) | 7.37 (0.50) | 1.19 |
| 333.15                                                          | 376 | 1.81 (0.94)  | 6.81 (0.06) | 0.81 |
|                                                                 | 480 | 1.81 (-0.50) | 6.81 (0.50) | 1.19 |
| <b><math>x_{\text{PFD}} = 0.2 / x_{\text{Hex}} = 0.8</math></b> |     |              |             |      |
| 293.15                                                          | 376 | 3.34 (0.97)  | 7.82 (0.03) | 1.01 |
|                                                                 | 480 | 3.34 (-0.50) | 7.82 (0.50) | 1.12 |
| 303.15                                                          | 376 | 2.72 (0.97)  | 7.18 (0.03) | 0.77 |
|                                                                 | 480 | 2.72 (-0.50) | 7.18 (0.50) | 1.16 |
| 313.15                                                          | 376 | 2.37 (0.95)  | 7.21 (0.05) | 0.86 |
|                                                                 | 480 | 2.37 (-0.50) | 7.21 (0.50) | 1.06 |
| 323.15                                                          | 376 | 2.00 (0.94)  | 6.64 (0.06) | 0.76 |
|                                                                 | 480 | 2.00 (-0.51) | 6.64 (0.49) | 1.10 |
| 333.15                                                          | 376 | 1.72 (0.94)  | 6.21 (0.06) | 0.83 |
|                                                                 | 480 | 1.72 (-0.51) | 6.21 (0.49) | 1.10 |
| <b><math>x_{\text{PFD}} = 0.0 / x_{\text{Hex}} = 1.0</math></b> |     |              |             |      |
| 293.15                                                          | 376 | 3.26 (0.96)  | 8.23 (0.04) | 0.84 |
|                                                                 | 480 | 3.26 (-0.49) | 8.23 (0.51) | 1.27 |
| 303.15                                                          | 376 | 2.71 (0.96)  | 7.50 (0.04) | 0.91 |
|                                                                 | 480 | 2.71 (-0.50) | 7.50 (0.50) | 1.33 |
| 313.15                                                          | 376 | 2.28 (0.95)  | 6.90 (0.05) | 0.90 |
|                                                                 | 480 | 2.28 (-0.50) | 6.90 (0.50) | 1.26 |
| 323.15                                                          | 376 | 1.89 (0.95)  | 6.46 (0.05) | 0.76 |
|                                                                 | 480 | 1.89 (-0.50) | 6.46 (0.50) | 1.26 |
| 333.15                                                          | 376 | 1.55 (0.93)  | 6.00 (0.07) | 0.78 |
|                                                                 | 480 | 1.55 (-0.50) | 6.00 (0.50) | 1.33 |

**Table S2.** Recovered Excited-State Intensity Decay Parameters for BPP (20  $\mu\text{M}$ ; excitation with 340 nm NanoLED) Dissolved in  $x_{\text{PFD}} = 0.95 / x_{\text{Hex}} = 0.05$  at Different Temperatures Obtained *via* Global Fitting Strategy. Errors Associated with Decay Times are  $\leq \pm 5\%$ .

| $T/\text{K}$                                    | $\lambda_{\text{em}}/\text{nm}$ | $\tau_1/\text{ns} (\alpha_1)$ | $\tau_2/\text{ns} (\alpha_2)$ | $\chi^2$ |
|-------------------------------------------------|---------------------------------|-------------------------------|-------------------------------|----------|
| $x_{\text{PFD}} = 0.95 / x_{\text{Hex}} = 0.05$ |                                 |                               |                               |          |
| 293.15                                          | 376                             | 4.84 (0.88)                   | 17.6 (0.12)                   | 3.51     |
|                                                 | 480                             | 4.84 (-0.35)                  | 17.6 (0.65)                   | 2.68     |
| 303.15                                          | 376                             | 4.02 (0.91)                   | 14.6 (0.09)                   | 3.98     |
|                                                 | 480                             | 4.02 (-0.40)                  | 14.6 (0.60)                   | 2.90     |
| 313.15                                          | 376                             | 3.22 (0.91)                   | 13.0 (0.09)                   | 3.80     |
|                                                 | 480                             | 3.22 (-0.41)                  | 13.0 (0.59)                   | 2.71     |
| 323.15                                          | 376                             | 2.51 (0.91)                   | 11.6 (0.09)                   | 3.60     |
|                                                 | 480                             | 2.51 (-0.44)                  | 11.6 (0.56)                   | 2.41     |
| 333.15                                          | 376                             | 1.92 (0.92)                   | 10.6 (0.08)                   | 2.55     |
|                                                 | 480                             | 1.92 (-0.47)                  | 10.6 (0.53)                   | 1.86     |

**Table S3.** Record of Various Rate Constants Associated with BPP (20  $\mu\text{M}$ ) Intramolecular Excimer Formation Using Birk's Scheme in PFD and *n*-hexane added PFD.

|                  |  | $k_a/\text{ns}^{-1}$ |                   |                   |                   |                   |                   |
|------------------|--|----------------------|-------------------|-------------------|-------------------|-------------------|-------------------|
| $x_{\text{PFD}}$ |  | 0.0                  | 0.2               | 0.5               | 0.8               | 0.9               | 1.0               |
| $T/\text{K}$     |  |                      |                   |                   |                   |                   |                   |
| 293.15           |  | $0.173 \pm 0.002$    | $0.173 \pm 0.002$ | $0.158 \pm 0.002$ | $0.121 \pm 0.002$ | $0.115 \pm 0.002$ | $0.088 \pm 0.004$ |
| 303.15           |  | $0.231 \pm 0.002$    | $0.227 \pm 0.002$ | $0.204 \pm 0.003$ | $0.162 \pm 0.002$ | $0.148 \pm 0.003$ | $0.123 \pm 0.005$ |
| 313.15           |  | $0.288 \pm 0.003$    | $0.262 \pm 0.003$ | $0.259 \pm 0.004$ | $0.222 \pm 0.003$ | $0.185 \pm 0.004$ | $0.178 \pm 0.006$ |
| 323.15           |  | $0.371 \pm 0.004$    | $0.318 \pm 0.003$ | $0.307 \pm 0.005$ | $0.281 \pm 0.004$ | $0.236 \pm 0.005$ | $0.239 \pm 0.007$ |
| 333.15           |  | $0.466 \pm 0.005$    | $0.384 \pm 0.004$ | $0.373 \pm 0.006$ | $0.362 \pm 0.005$ | $0.304 \pm 0.006$ | $0.313 \pm 0.009$ |

|                  |  | $k_d/\text{ns}^{-1}$ |                   |                   |                   |                   |                   |
|------------------|--|----------------------|-------------------|-------------------|-------------------|-------------------|-------------------|
| $x_{\text{PFD}}$ |  | 0.0                  | 0.2               | 0.5               | 0.8               | 0.9               | 1.0               |
| $T/\text{K}$     |  |                      |                   |                   |                   |                   |                   |
| 293.15           |  | $0.008 \pm 0.003$    | $0.005 \pm 0.003$ | $0.005 \pm 0.004$ | $0.008 \pm 0.003$ | $0.013 \pm 0.003$ | $0.006 \pm 0.004$ |
| 303.15           |  | $0.009 \pm 0.003$    | $0.007 \pm 0.003$ | $0.006 \pm 0.004$ | $0.011 \pm 0.003$ | $0.018 \pm 0.004$ | $0.009 \pm 0.006$ |
| 313.15           |  | $0.014 \pm 0.004$    | $0.015 \pm 0.004$ | $0.014 \pm 0.005$ | $0.017 \pm 0.004$ | $0.023 \pm 0.005$ | $0.016 \pm 0.006$ |
| 323.15           |  | $0.018 \pm 0.005$    | $0.022 \pm 0.004$ | $0.017 \pm 0.006$ | $0.021 \pm 0.005$ | $0.025 \pm 0.007$ | $0.019 \pm 0.008$ |
| 333.15           |  | $0.032 \pm 0.006$    | $0.026 \pm 0.005$ | $0.025 \pm 0.007$ | $0.037 \pm 0.007$ | $0.032 \pm 0.007$ | $0.025 \pm 0.012$ |

|                  |  | $k_E/\text{ns}^{-1}$ |                   |                   |                   |                   |                   |
|------------------|--|----------------------|-------------------|-------------------|-------------------|-------------------|-------------------|
| $x_{\text{PFD}}$ |  | 0.0                  | 0.2               | 0.5               | 0.8               | 0.9               | 1.0               |
| $T/\text{K}$     |  |                      |                   |                   |                   |                   |                   |
| 293.15           |  | $0.121 \pm 0.001$    | $0.128 \pm 0.001$ | $0.106 \pm 0.002$ | $0.072 \pm 0.001$ | $0.067 \pm 0.001$ | $0.066 \pm 0.002$ |
| 303.15           |  | $0.134 \pm 0.001$    | $0.139 \pm 0.001$ | $0.115 \pm 0.002$ | $0.082 \pm 0.002$ | $0.077 \pm 0.002$ | $0.077 \pm 0.002$ |
| 313.15           |  | $0.145 \pm 0.001$    | $0.138 \pm 0.001$ | $0.123 \pm 0.002$ | $0.092 \pm 0.002$ | $0.088 \pm 0.002$ | $0.088 \pm 0.003$ |
| 323.15           |  | $0.156 \pm 0.002$    | $0.150 \pm 0.001$ | $0.135 \pm 0.002$ | $0.105 \pm 0.002$ | $0.102 \pm 0.002$ | $0.103 \pm 0.003$ |
| 333.15           |  | $0.168 \pm 0.002$    | $0.160 \pm 0.001$ | $0.146 \pm 0.002$ | $0.131 \pm 0.003$ | $0.118 \pm 0.002$ | $0.117 \pm 0.004$ |

|                  |  | $k_M/\text{ns}^{-1}$ |                   |                   |                   |                   |                   |
|------------------|--|----------------------|-------------------|-------------------|-------------------|-------------------|-------------------|
| $x_{\text{PFD}}$ |  | 0.0                  | 0.2               | 0.5               | 0.8               | 0.9               | 1.0               |
| $T/\text{K}$     |  |                      |                   |                   |                   |                   |                   |
| 293.15           |  | $0.127 \pm 0.001$    | $0.122 \pm 0.001$ | $0.110 \pm 0.002$ | $0.075 \pm 0.002$ | $0.063 \pm 0.001$ | $0.057 \pm 0.002$ |
| 303.15           |  | $0.128 \pm 0.001$    | $0.134 \pm 0.001$ | $0.117 \pm 0.002$ | $0.085 \pm 0.002$ | $0.074 \pm 0.002$ | $0.066 \pm 0.002$ |
| 313.15           |  | $0.136 \pm 0.001$    | $0.146 \pm 0.001$ | $0.126 \pm 0.002$ | $0.093 \pm 0.002$ | $0.086 \pm 0.002$ | $0.077 \pm 0.002$ |
| 323.15           |  | $0.139 \pm 0.001$    | $0.161 \pm 0.002$ | $0.141 \pm 0.002$ | $0.103 \pm 0.002$ | $0.098 \pm 0.002$ | $0.091 \pm 0.002$ |
| 333.15           |  | $0.146 \pm 0.001$    | $0.172 \pm 0.002$ | $0.155 \pm 0.002$ | $0.115 \pm 0.002$ | $0.111 \pm 0.002$ | $0.105 \pm 0.002$ |

**Table S4.** Recovered Excited-State Intensity Decay Parameters for 1-Methylpyrene (20  $\mu\text{M}$ ; excitation with 340 nm NanoLED) Dissolved in PFD and *n*-Hexane Added PFD at Different Mole Fraction Ratios and at Different Temperatures. Errors Associated with Decay Times are  $\leq \pm 5\%$ .

| $T/\text{K}$                                    | $\lambda_{\text{em}}/\text{nm}$ | $\tau_1/\text{ns} (\alpha_1)$ | $\tau_2/\text{ns} (\alpha_2)$ | $\chi^2$ |
|-------------------------------------------------|---------------------------------|-------------------------------|-------------------------------|----------|
| $x_{\text{PFD}} = 1.0 / x_{\text{Hex}} = 0.0$   |                                 |                               |                               |          |
| 293.15                                          | 376                             | 17.6 (1.00)                   |                               | 1.40     |
|                                                 |                                 | 1.28 (0.01)                   | 17.8 (0.99)                   | 1.37     |
| 303.15                                          | 376                             | 15.2 (1.00)                   |                               | 1.15     |
|                                                 |                                 | 2.50 (0.02)                   | 15.4 (0.98)                   | 1.12     |
| 313.15                                          | 376                             | 12.9 (1.00)                   |                               | 1.22     |
|                                                 |                                 | 2.19 (0.02)                   | 13.1 (0.98)                   | 1.19     |
| 323.15                                          | 376                             | 11.0 (1.00)                   |                               | 1.16     |
|                                                 |                                 | 3.54 (0.04)                   | 11.3 (0.96)                   | 1.12     |
| 333.15                                          | 376                             | 9.48 (1.00)                   |                               | 1.37     |
|                                                 |                                 | 2.57 (0.04)                   | 10.8 (0.96)                   | 1.22     |
| $x_{\text{PFD}} = 0.95 / x_{\text{Hex}} = 0.05$ |                                 |                               |                               |          |
| 293.15                                          | 376                             | 16.7 (1.00)                   |                               | 1.26     |
|                                                 |                                 | 2.51 (0.02)                   | 17.0 (0.98)                   | 1.19     |
| 303.15                                          | 376                             | 14.4 (1.00)                   |                               | 1.40     |
|                                                 |                                 | 1.06 (0.01)                   | 14.5 (0.99)                   | 1.36     |
| 313.15                                          | 376                             | 12.4 (1.00)                   |                               | 1.21     |
|                                                 |                                 | 3.77 (0.05)                   | 12.9 (0.95)                   | 1.12     |
| 323.15                                          | 376                             | 10.8 (1.00)                   |                               | 1.31     |
|                                                 |                                 | 1.11 (0.03)                   | 11.0 (0.97)                   | 1.20     |
| 333.15                                          | 376                             | 9.40 (1.00)                   |                               | 1.30     |
|                                                 |                                 | 1.77 (0.03)                   | 9.60 (0.97)                   | 1.22     |
| $x_{\text{PFD}} = 0.9 / x_{\text{Hex}} = 0.1$   |                                 |                               |                               |          |
| 293.15                                          | 376                             | 15.3 (1.00)                   |                               | 1.36     |
|                                                 |                                 | 2.51 (0.04)                   | 15.9 (0.96)                   | 1.14     |



---

|                                                                 |     |             |             |      |
|-----------------------------------------------------------------|-----|-------------|-------------|------|
| 303.15                                                          | 376 | 13.0 (1.00) |             | 1.32 |
|                                                                 |     | 2.49 (0.04) | 13.6 (0.96) | 1.13 |
| 313.15                                                          | 376 | 11.2 (1.00) |             | 1.41 |
|                                                                 |     | 2.12 (0.04) | 11.6 (0.96) | 1.22 |
| 323.15                                                          | 376 | 9.71 (1.00) |             | 1.42 |
|                                                                 |     | 2.44 (0.06) | 10.2 (0.93) | 1.18 |
| 333.15                                                          | 376 | 8.59 (1.00) |             | 1.43 |
|                                                                 |     | 1.86 (0.06) | 8.99 (0.94) | 1.21 |
| <b><math>x_{\text{PFD}} = 0.8 / x_{\text{Hex}} = 0.2</math></b> |     |             |             |      |
| 293.15                                                          | 376 | 13.2 (1.00) |             | 1.18 |
|                                                                 |     | 1.11 (0.01) | 13.3 (0.99) | 1.14 |
| 303.15                                                          | 376 | 11.7 (1.00) |             | 1.26 |
|                                                                 |     | 1.07 (0.01) | 11.8 (0.99) | 1.23 |
| 313.15                                                          | 376 | 10.6 (1.00) |             | 1.28 |
|                                                                 |     | 1.23 (0.02) | 10.7 (0.98) | 1.21 |
| 323.15                                                          | 376 | 9.55 (1.00) |             | 1.29 |
|                                                                 |     | 1.08 (0.02) | 9.67 (0.98) | 1.24 |
| 333.15                                                          | 376 | 8.58 (1.00) |             | 1.16 |
|                                                                 |     | 1.05 (0.02) | 8.68 (0.98) | 1.13 |
| <b><math>x_{\text{PFD}} = 0.5 / x_{\text{Hex}} = 0.5</math></b> |     |             |             |      |
| 293.15                                                          | 376 | 8.93 (1.00) |             | 1.81 |
|                                                                 |     | 1.11 (0.02) | 9.09 (0.98) | 1.18 |
| 303.15                                                          | 376 | 8.49 (1.00) |             | 1.21 |
|                                                                 |     | 1.62 (0.03) | 8.55 (0.97) | 1.17 |
| 313.15                                                          | 376 | 7.74 (1.00) |             | 1.11 |
|                                                                 |     | 2.09 (0.03) | 7.93 (0.97) | 1.06 |
| 323.15                                                          | 376 | 6.89 (1.00) |             | 1.32 |
|                                                                 |     | 1.65 (0.04) | 7.08 (0.96) | 1.24 |
| 333.15                                                          | 376 | 6.29 (1.00) |             | 1.27 |

---

---

|                                                                 |     |             |             |      |
|-----------------------------------------------------------------|-----|-------------|-------------|------|
|                                                                 |     | 1.16 (0.04) | 6.44 (0.96) | 1.17 |
| <b><math>x_{\text{PFD}} = 0.2 / x_{\text{Hex}} = 0.8</math></b> |     |             |             |      |
| 293.15                                                          | 376 | 8.11 (1.00) |             | 1.36 |
|                                                                 |     | 0.11 (0.09) | 8.23 (0.91) | 1.13 |
| 303.15                                                          | 376 | 7.36 (1.00) |             | 1.26 |
|                                                                 |     | 1.61 (0.03) | 7.49 (0.97) | 1.22 |
| 313.15                                                          | 376 | 6.75 (1.00) |             | 1.20 |
|                                                                 |     | 0.66 (0.02) | 6.85 (0.98) | 1.14 |
| 323.15                                                          | 376 | 6.18 (1.00) |             | 1.13 |
|                                                                 |     | 0.42 (0.02) | 6.21 (0.98) | 1.07 |
| 333.15                                                          | 376 | 5.74 (1.00) |             | 1.03 |
|                                                                 |     | 0.37 (0.03) | 5.80 (0.97) | 0.98 |
| <b><math>x_{\text{PFD}} = 0.0 / x_{\text{Hex}} = 1.0</math></b> |     |             |             |      |
| 293.15                                                          | 376 | 7.14 (1.00) |             | 2.39 |
|                                                                 |     | 1.34 (0.13) | 7.90 (0.87) | 1.08 |
| 303.15                                                          | 376 | 7.05 (1.00) |             | 2.92 |
|                                                                 |     | 1.29 (0.13) | 7.79 (0.87) | 1.32 |
| 313.15                                                          | 376 | 6.68 (1.00) |             | 2.63 |
|                                                                 |     | 1.13 (0.13) | 7.38 (0.87) | 1.09 |
| 323.15                                                          | 376 | 6.46 (1.00) |             | 2.51 |
|                                                                 |     | 1.19 (0.14) | 7.18 (0.86) | 1.14 |
| 333.15                                                          | 376 | 6.16 (1.00) |             | 2.52 |
|                                                                 |     | 1.11 (0.14) | 6.85 (0.86) | 0.95 |

---

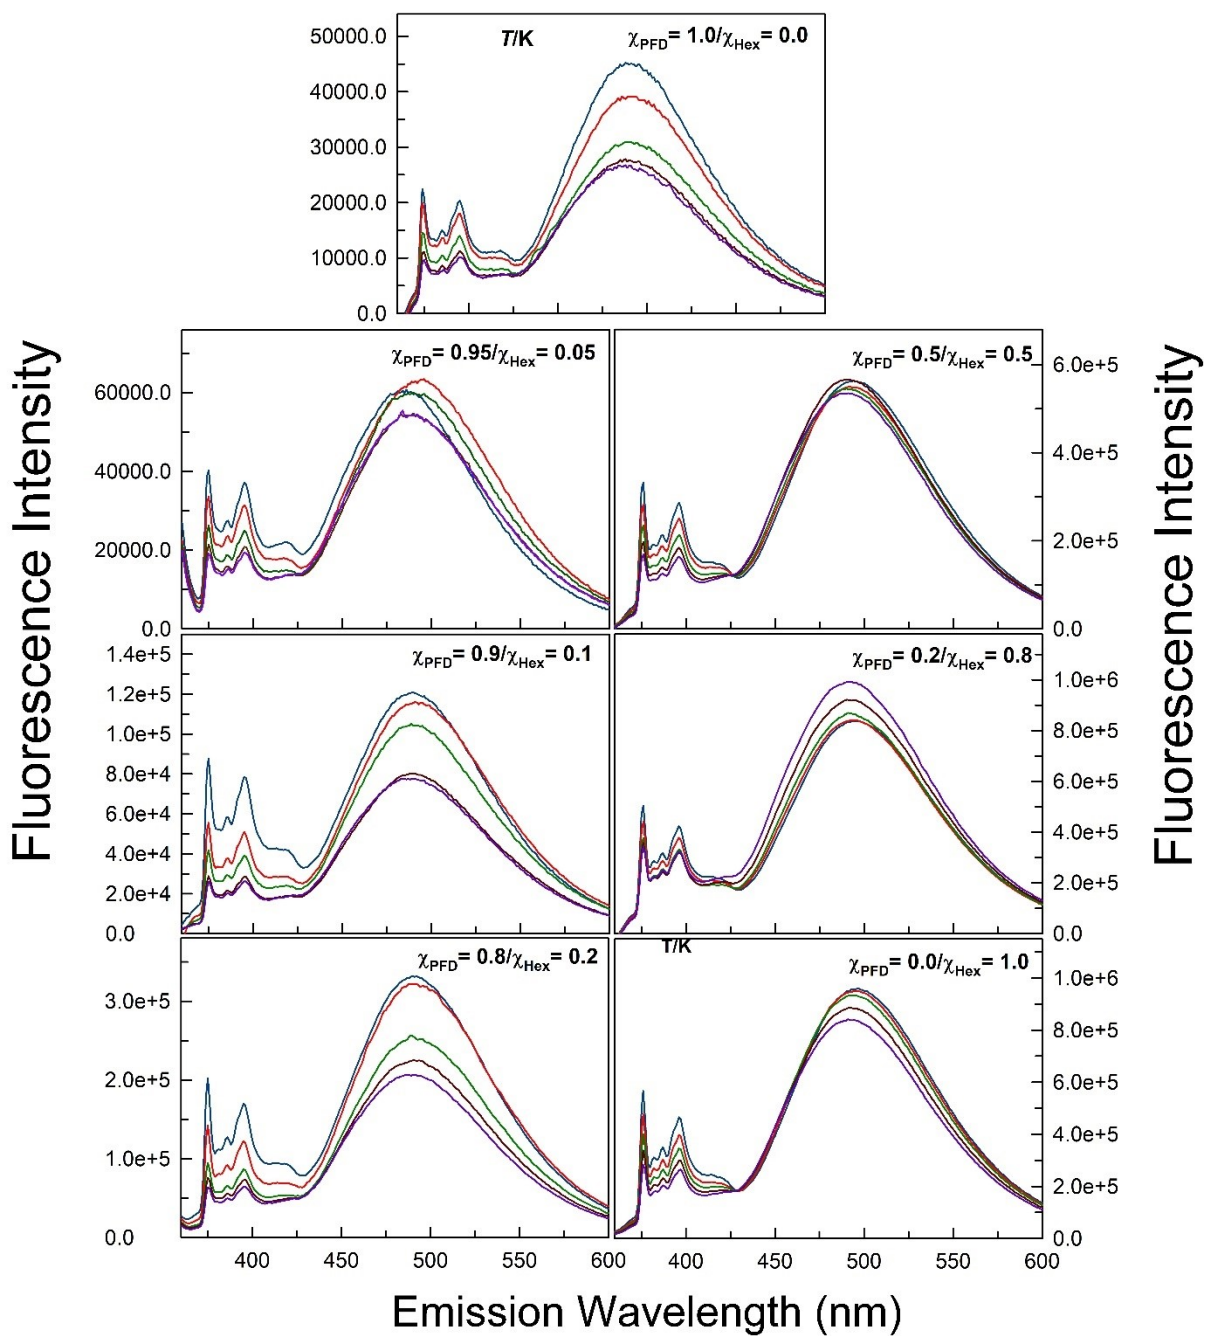

**Figure S1:** Steady-state fluorescence emission spectra [ $\lambda_{\text{ex}} = 340$  nm; excitation and emission slits are 2.0 and 2.0 nm, respectively] of BPP (20  $\mu\text{M}$ ) dissolved in PFD and *n*-hexane added PFD over the temperature range ( $T = 293.15\text{--}333.15$  K).

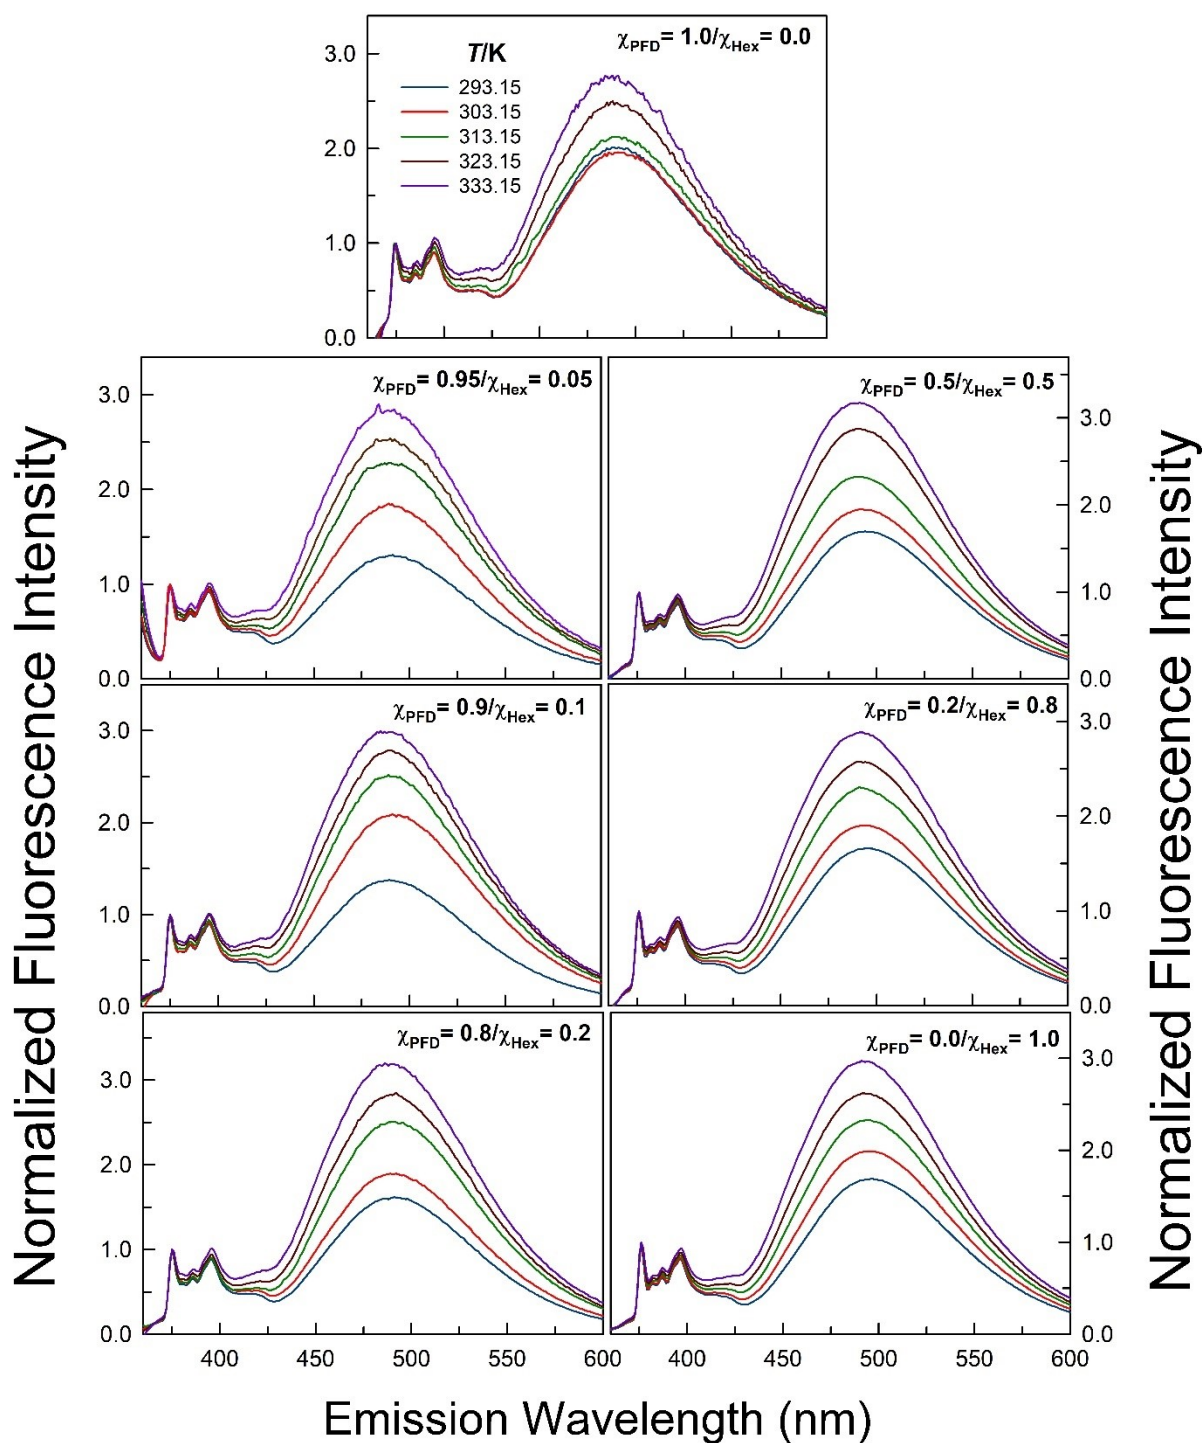

**Figure S2:** Normalized Steady-state fluorescence emission spectra [ $\lambda_{\text{ex}} = 340$  nm; excitation and emission slits are 2.0 and 2.0 nm, respectively] of BPP (20  $\mu\text{M}$ ) dissolved in PFD and *n*-hexane added PFD over the temperature range ( $T = 293.15$ – $333.15$  K).

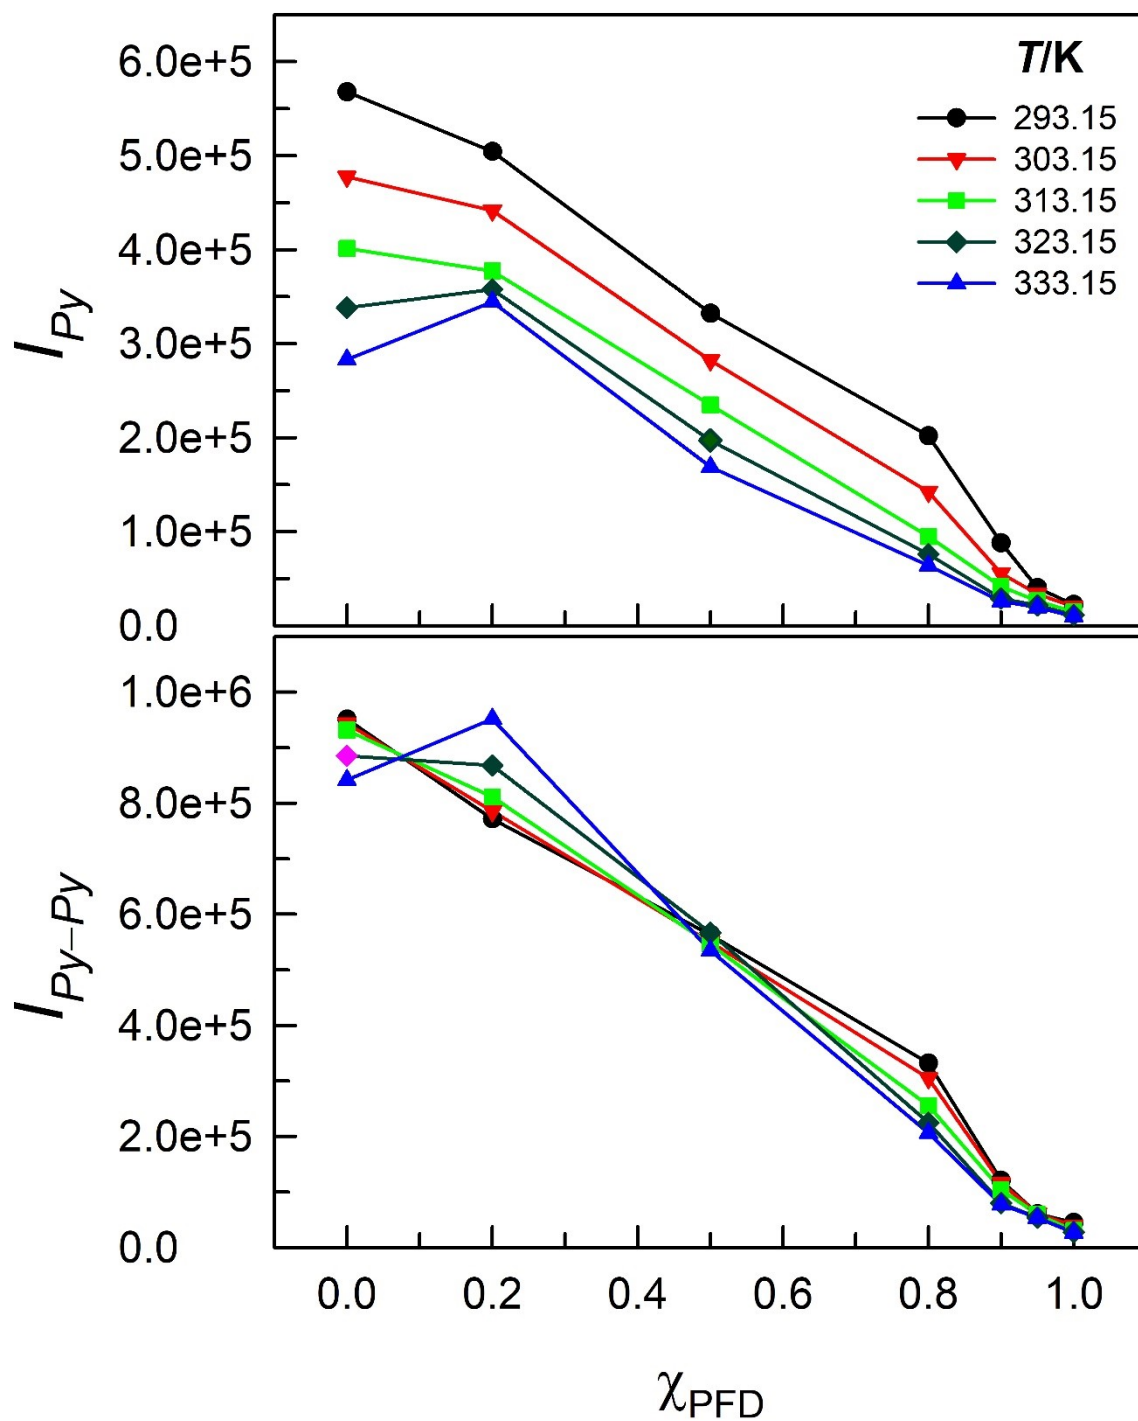

**Figure S3:** Variation of  $I_{\text{Py-Py}}$  and  $I_{\text{Py}}$  with mole ratio for BPP (20  $\mu\text{M}$ ) dissolved in PFD and *n*-hexane added PFD at different temperatures.

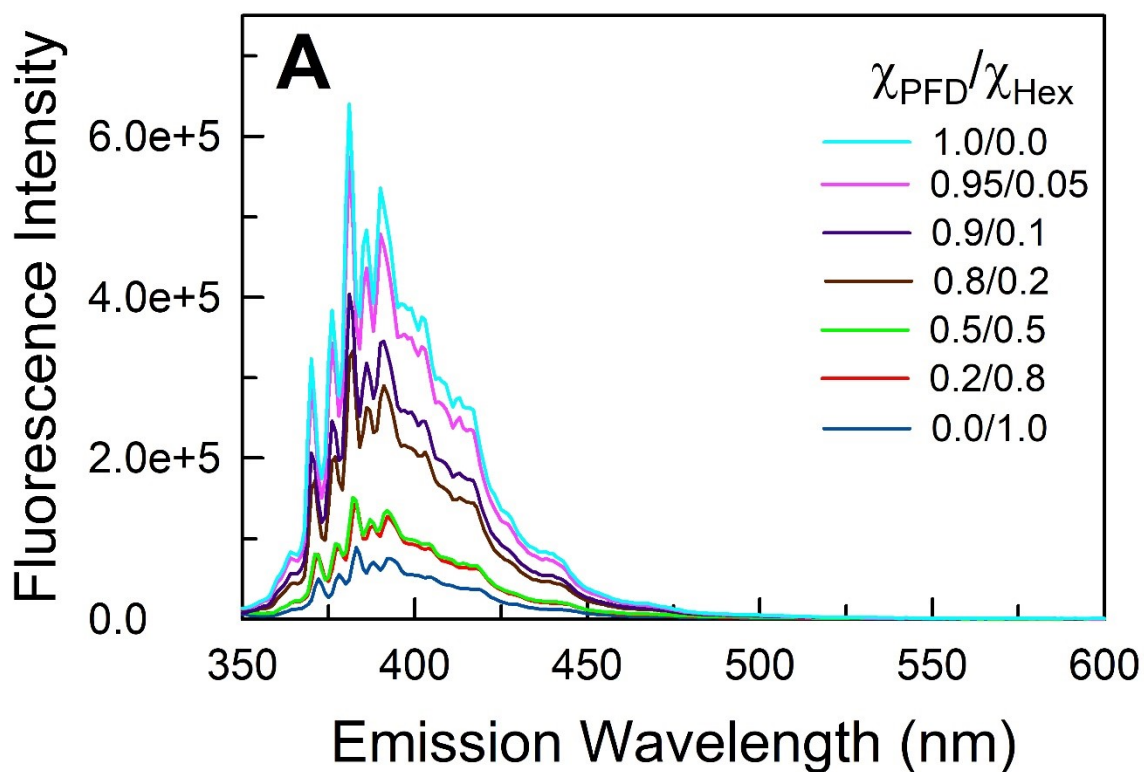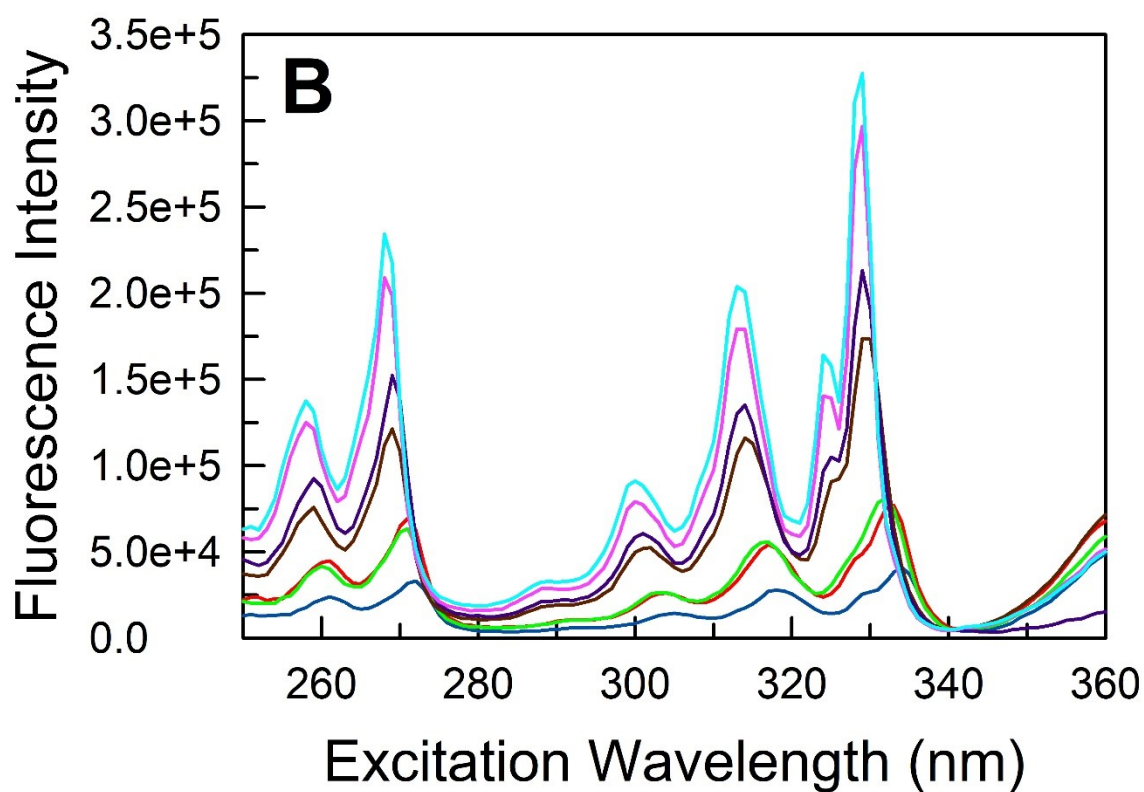

**Figure S4:** Steady-state fluorescence emission spectra [panel A;  $\lambda_{\text{ex}} = 329$  nm] and excitation spectra [panel B;  $\lambda_{\text{em}} = 370$  nm] of pyrene ( $20 \mu\text{M}$ ) dissolved in PFD and *n*-hexane added PFD at  $T = 298.15$  K (excitation and emission slits are 1.0 and 1.0 nm, respectively).

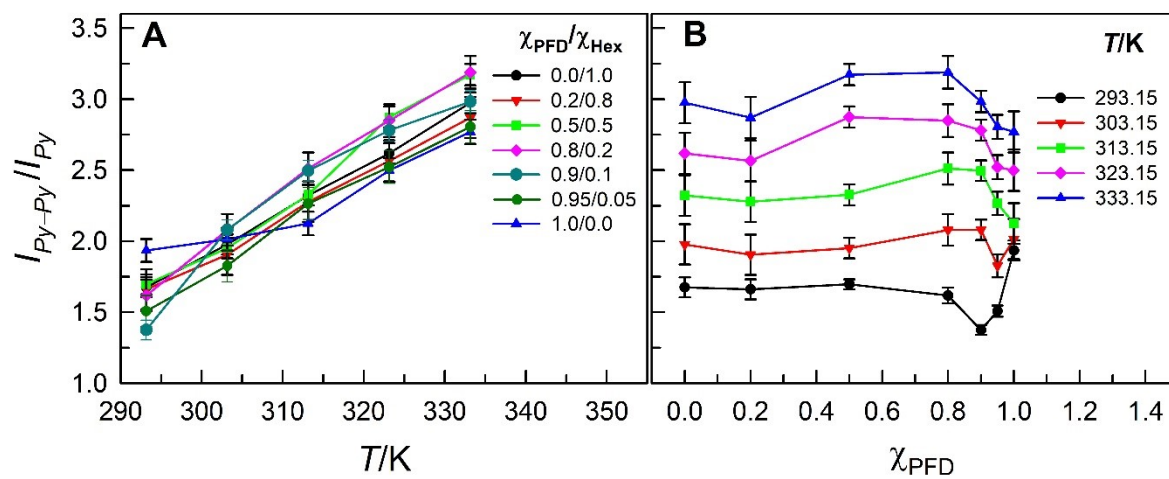

**Figure S5:** Variation of  $I_{Py-Py} / I_{Py}$  with temperature (panel A) and with mole ratio (panel B) for BPP (20  $\mu$ M) dissolved in PFD and *n*-hexane added PFD.

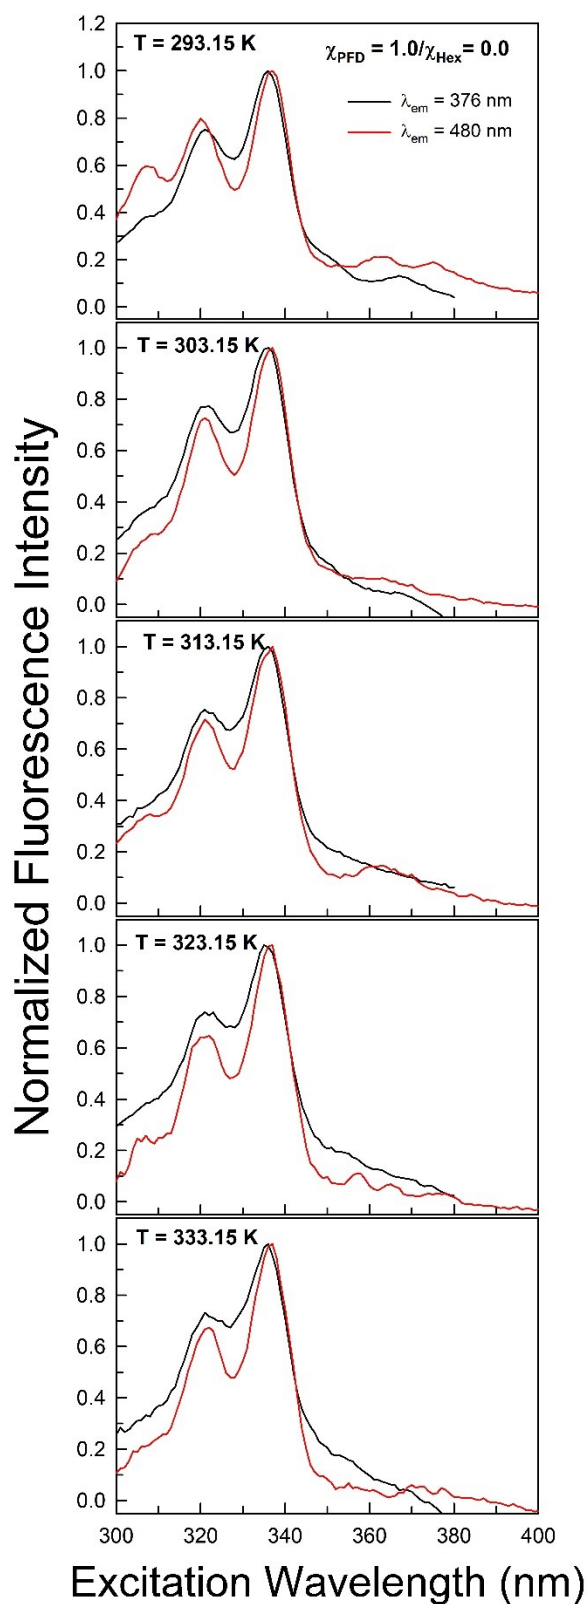

**Figure S6:** Fluorescence excitation spectra [ $\lambda_{em} = 376$  nm, and 480 nm; excitation and emission slits are 2.0 and 2.0 nm, respectively] of BPP (20  $\mu$ M) dissolved in PFD over the temperature range ( $T = 293.15$ – $333.15$  K).



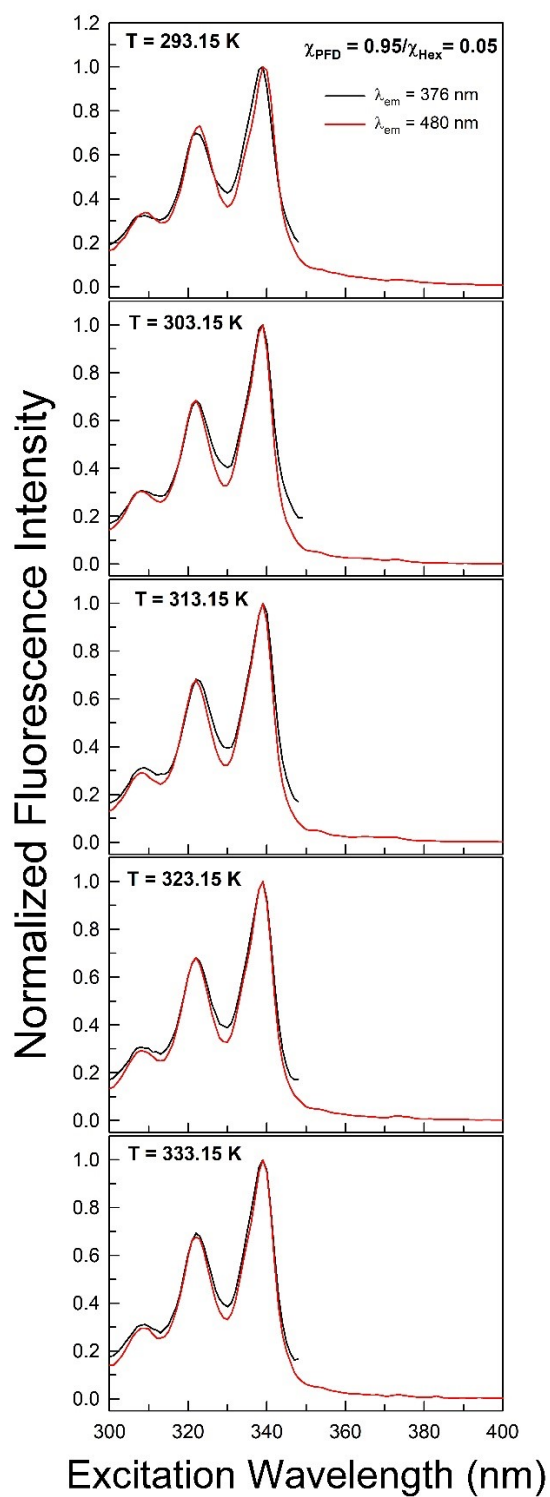

**Figure S7:** Fluorescence excitation spectra [ $\lambda_{em} = 376$  nm, and 480 nm; excitation and emission slits are 2.0 and 2.0 nm, respectively] of BPP (20  $\mu$ M) dissolved in *n*-hexane added PFD ( $x_{PFD} = 0.95/x_{Hex} = 0.05$ ) over the temperature range ( $T = 293.15$ – $333.15$  K).

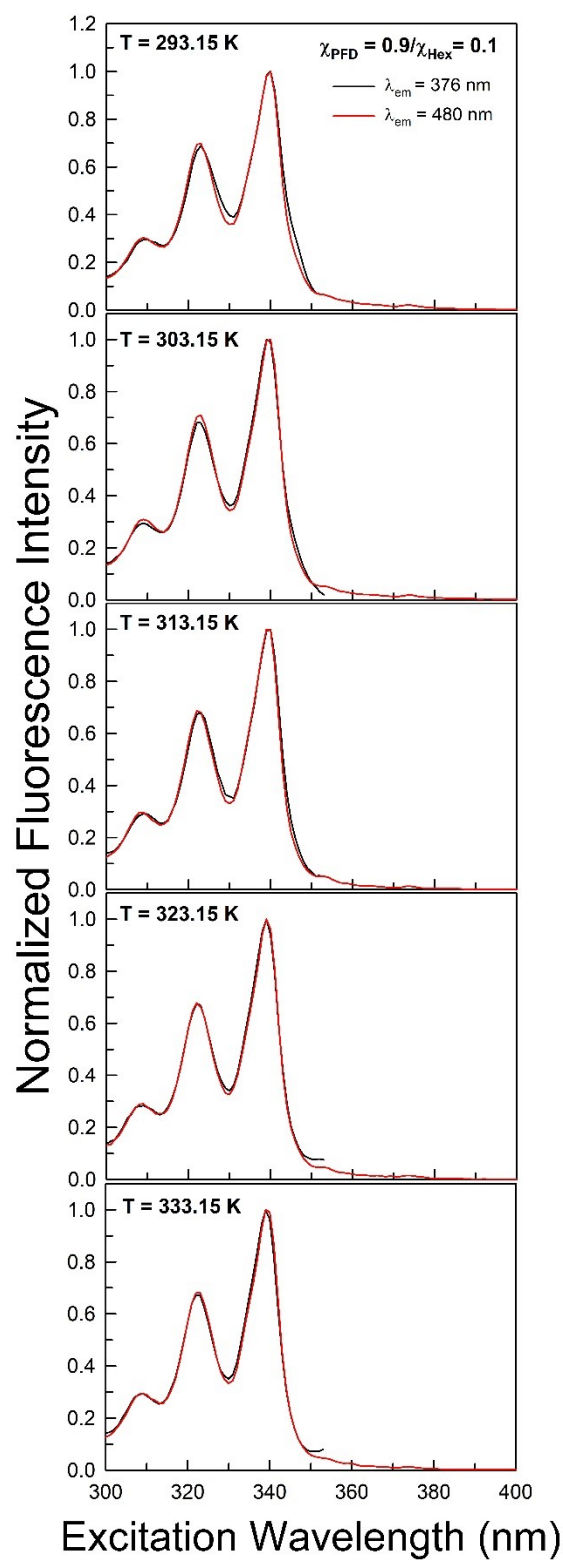

**Figure S8:** Fluorescence excitation spectra [ $\lambda_{em} = 376$  nm, and 480 nm; excitation and emission slits are 2.0 and 2.0 nm, respectively] of BPP (20  $\mu$ M) dissolved in *n*-hexane added PFD ( $x_{PFD} = 0.9/x_{Hex} = 0.1$ ) over the temperature range ( $T = 293.15$ – $333.15$  K).

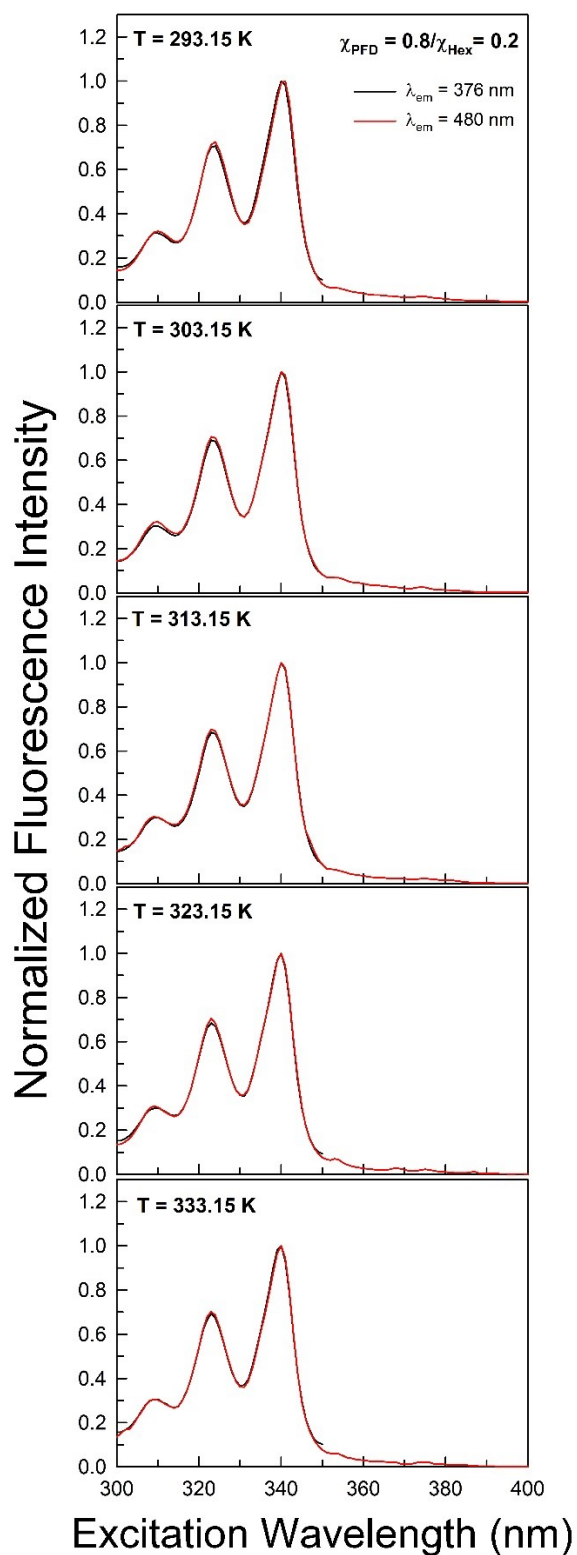

**Figure S9:** Fluorescence excitation spectra [ $\lambda_{\text{em}} = 376$  nm, and 480 nm; excitation and emission slits are 2.0 and 2.0 nm, respectively] of BPP (20  $\mu\text{M}$ ) dissolved in *n*-hexane added PFD ( $x_{\text{PFD}} = 0.8/x_{\text{Hex}} = 0.2$ ) over the temperature range ( $T = 293.15\text{--}333.15$  K).

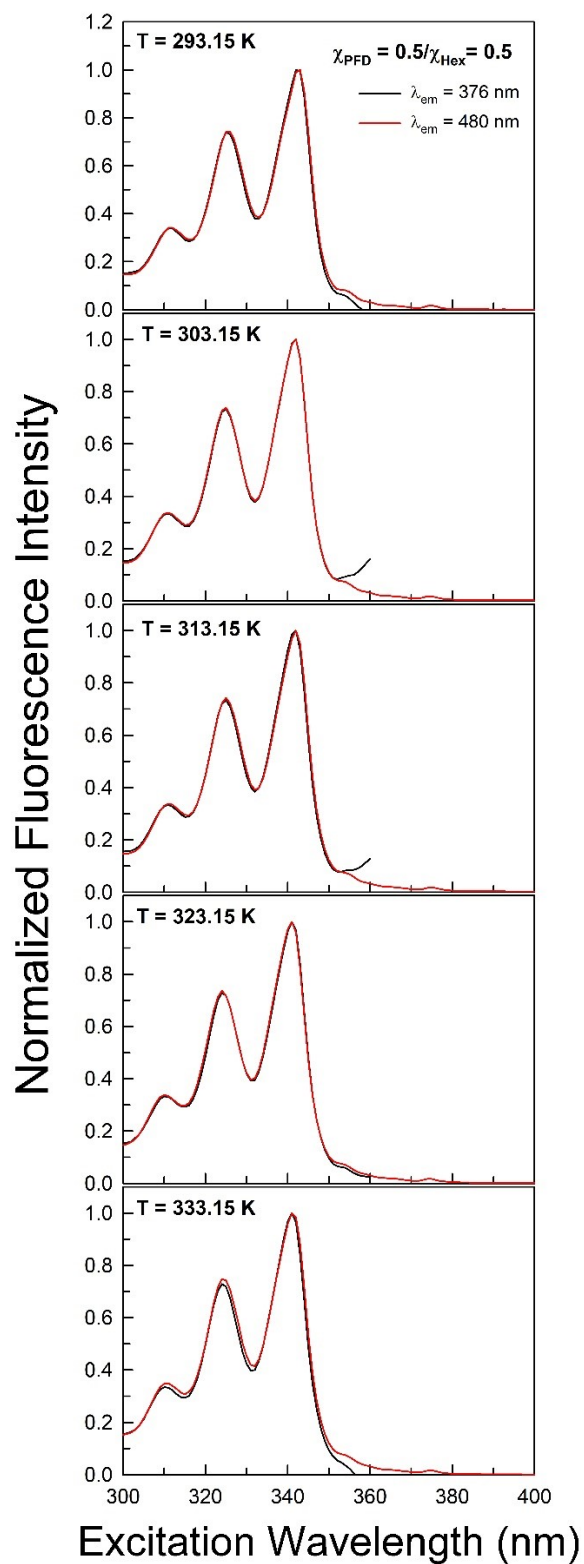

**Figure S10:** Fluorescence excitation spectra [ $\lambda_{\text{em}} = 376$  nm, and 480 nm; excitation and emission slits are 2.0 and 2.0 nm, respectively] of BPP (20  $\mu\text{M}$ ) dissolved in *n*-hexane added PFD ( $x_{\text{PFD}} = 0.5/x_{\text{Hex}} = 0.5$ ) over the temperature range ( $T = 293.15\text{--}333.15$  K).

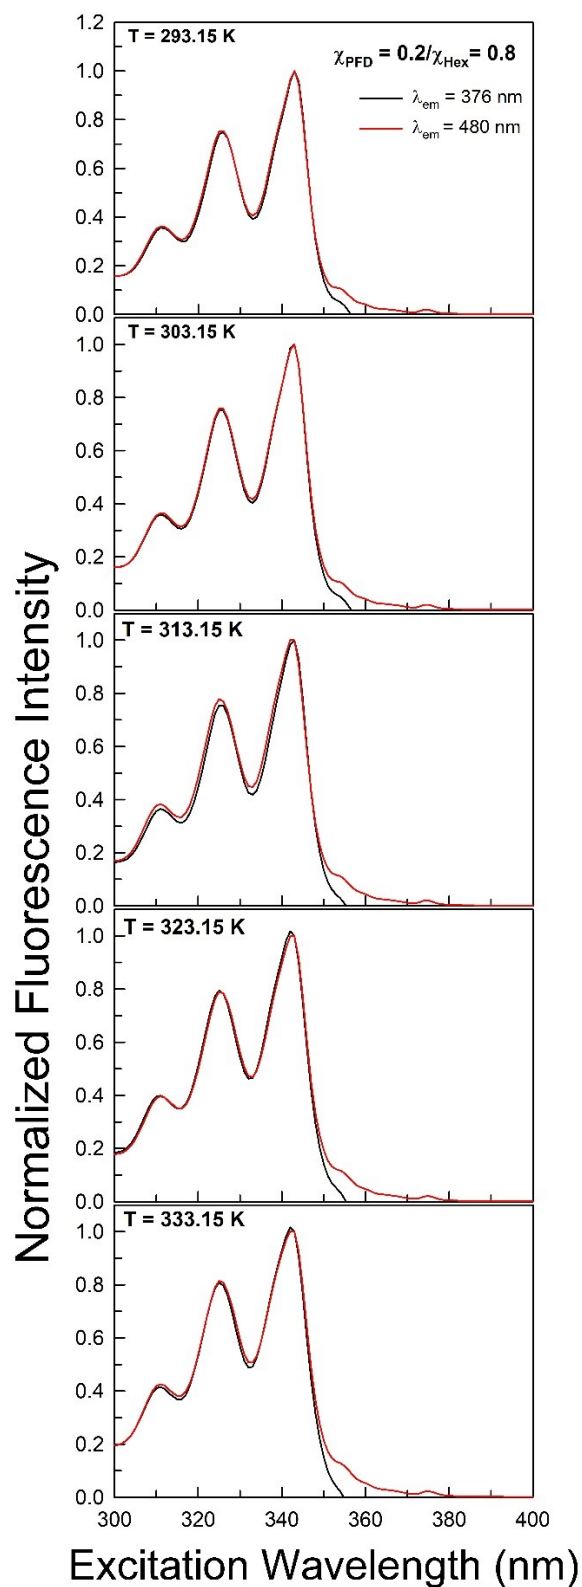

**Figure S11:** Fluorescence excitation spectra [ $\lambda_{\text{em}} = 376$  nm, and 480 nm; excitation and emission slits are 2.0 and 2.0 nm, respectively] of BPP (20  $\mu\text{M}$ ) dissolved in *n*-hexane added PFD ( $x_{\text{PFD}} = 0.2/x_{\text{Hex}} = 0.8$ ) over the temperature range ( $T = 293.15\text{--}333.15$  K).

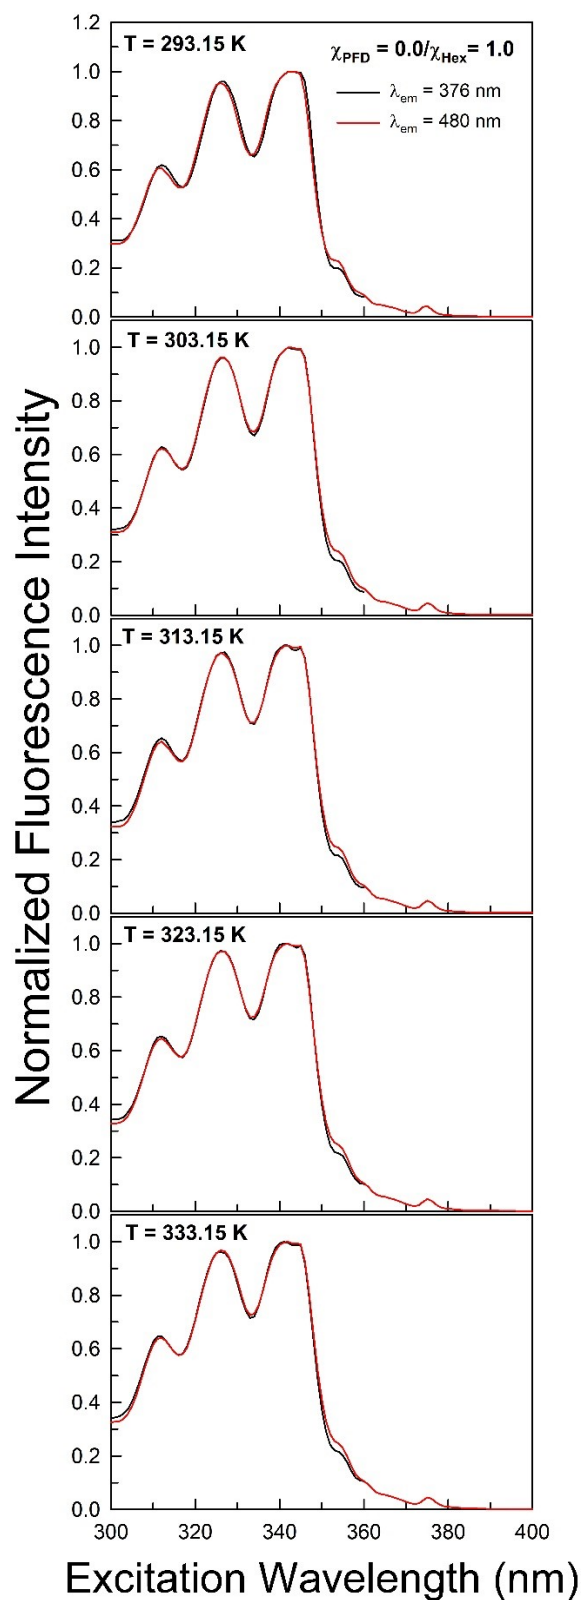

**Figure S12:** Fluorescence excitation spectra [ $\lambda_{\text{em}} = 376$  nm, and 480 nm; excitation and emission slits are 2.0 and 2.0 nm, respectively] of BPP (20  $\mu\text{M}$ ) dissolved in *n*-hexane added PFD ( $x_{\text{PFD}} = 0.0/x_{\text{Hex}} = 1.0$ ) over the temperature range ( $T = 293.15\text{--}333.15$  K).

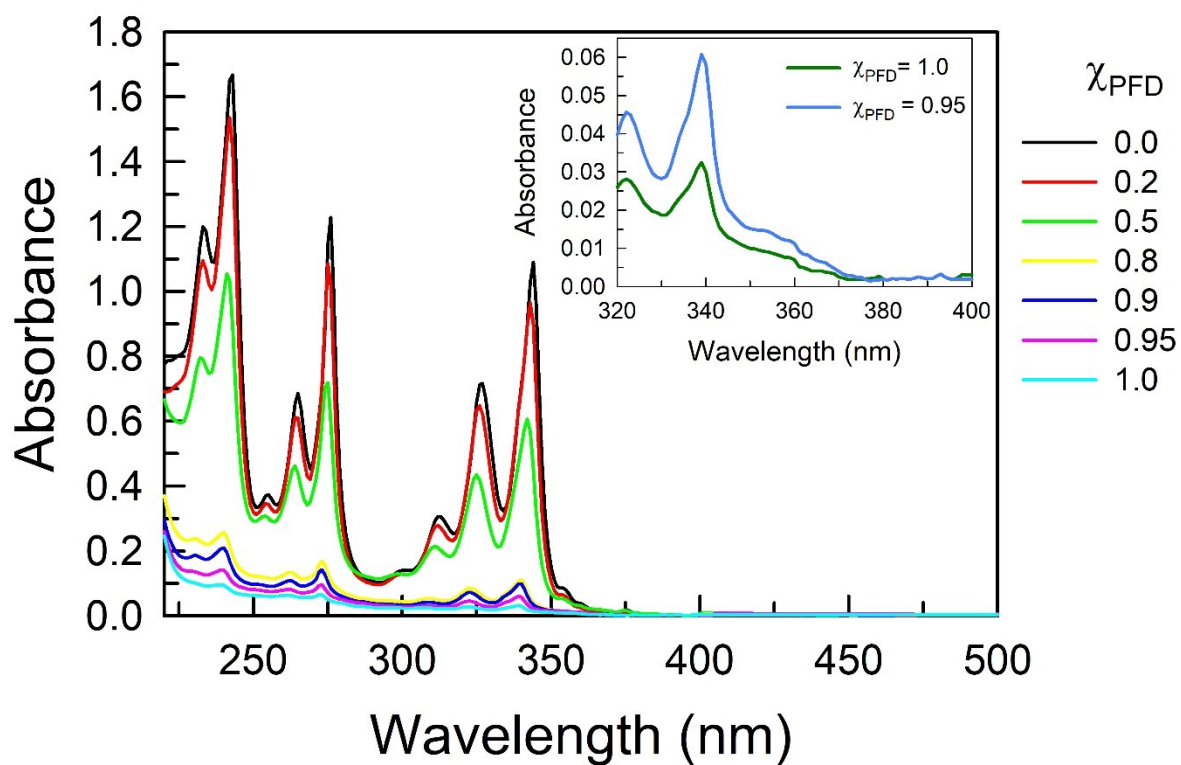

**Figure S13:** UV-vis absorbance spectra of BPP (20  $\mu$ M) dissolved in PFD, *n*-hexane, and *n*-hexane added PFD mixtures under ambient conditions. Inset shows magnified absorbance intensity in  $\chi_{PFD} = 0.95$  and 1.0, respectively.

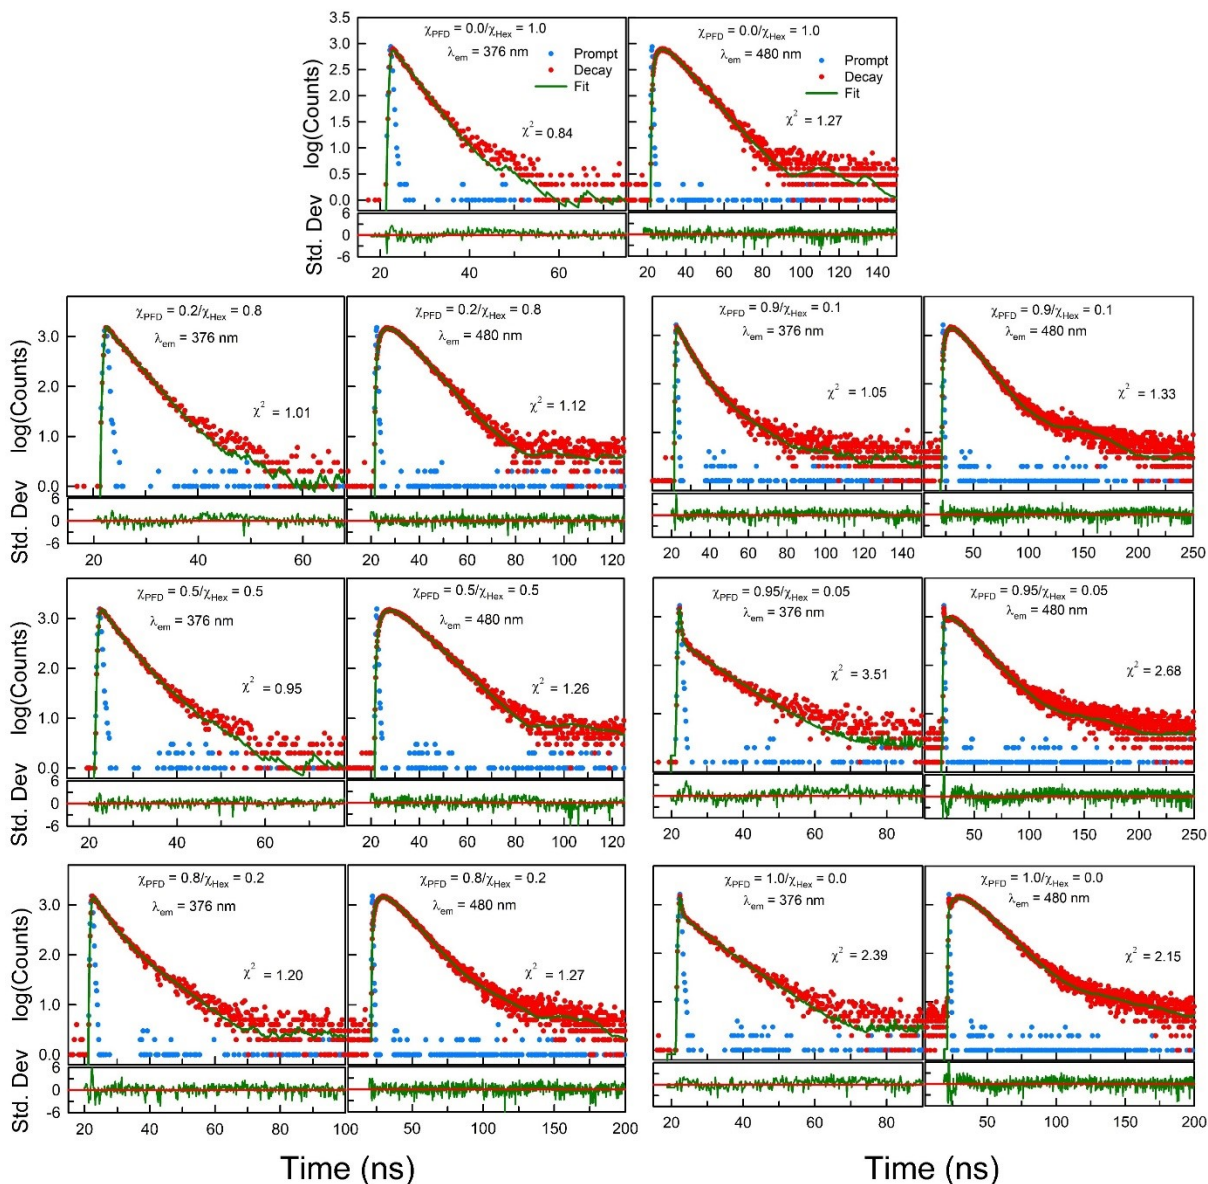

**Figure S14:** Fits to double exponential decay function of the excited-state intensity decay of BPP (20  $\mu\text{M}$ ; excitation with 340 nm NanoLED) dissolved in PFD and *n*-hexane added PFD at 376 nm (left panel) and 480 nm (right panel) at 293.15 K via global fitting strategy. Residuals are provided below each panel.
